# Supplementary material for: Stearate-rich diet and oleate restriction directly inhibit tumor growth via the unfolded protein response
Source: Research Square preprint supplement (doi:10.21203/rs.3.rs-4198546/v1), 2024-04-19
Supplement: Supplementary file 1 [file 89d0cf9243e1ba46bce0425b.docx]

Supplementary Text

**Patient of PDX82:**

A 38-year-old female patient with a G2P1 obstetric history and no significant prior medical conditions presented to the hospital with complaints of abdominal distension and rapid weight gain. Diagnostic paracentesis confirmed the presence of adenocarcinoma. Further imaging studies identified a lesion occupying the pelvic region, and blood tests indicated an elevated tumor marker, CA125, at a concentration of 8,780 U/mL. Subsequently, an immediate diagnostic laparoscopy was performed owing to  ovarian cancer suspicion, during which a tissue sample was collected to establish a patient-derived xenograft model, PDX82.

The pathological diagnosis confirmed a high-grade serous ovarian carcinoma, and a dose-dense chemotherapy regimen consisting of taxol and carboplatin (TC) was initiated. Four months after the initial diagnosis, the patient underwent interval debulking surgery, which included a total hysterectomy, bilateral salpingo-oophorectomy, omentectomy, peritoneal stripping, low anterior resection of the rectum, diaphragmatic stripping, and resection of surface metastases on the liver and spleen. The postoperative pathological evaluation revealed a stage of ypT3CN1, classified as FIGO stage 4B.

Four to nine months after diagnosis, adjuvant chemotherapy employing the TC regimen was administered. During a follow-up examination at 24 months post-diagnosis, an elevated CA125 level of 106  U/mL was noted. Magnetic resonance imaging (MRI) revealed the presence of recurrent tumors in the pelvic and para-aortic lymph node regions. Consequently, four cycles of pegylated liposomal doxorubicin and carboplatin (PLD/CBDCA) were administered, achieving complete remission and indicating that the tumor remained platinum-sensitive. Maintenance therapy with laparib was initiated at 28 months post-diagnosis.

As of 80 months post-diagnosis, the patient remains in a disease-free state. Genetic testing was conducted using the NCC Oncopanel FC v.3.0, which identified a BRCA2 mutation, specifically c4936_4939del(p.Glu1646Glnfs*23).

**Patient of PDX72:**

A 43-year-old female patient, gravida 3, para 3, presented to the hospital with chief complaints of abdominal distension. Elevated levels of the tumor marker CA125 were observed, registering a value of 84  U/mL. Diagnosis of adenocarcinoma was confirmed via abdominocentesis. Further imaging studies led to the diagnosis of stage Ic3 ovarian cancer.

Following one cycle of TC chemotherapy, primary debulking surgery was performed. The postoperative pathological diagnosis revealed ypT3aNxM0. Adjuvant chemotherapy with TC was continued for 24 months from the time of initial diagnosis.

Forty-eight months after diagnosis, a computed tomography scan indicated recurrence at the liver surface and pelvic wall. Despite administering TC chemotherapy, tumor enlargement was observed, leading to a diagnosis of platinum-resistant, progressive disease. At 57 months post-diagnosis, SDS involving hepatic tumor resection, omentectomy, splenectomy, partial resection of the right costal margin of the sternum, and resection of the parietal diaphragm and periesophageal lymph nodes was executed. This operation constituted a complete surgery. Concurrently, a patient-derived xenograft (PDX72) was established from the excised tumor. Postoperative chemotherapy with PLD/CBDCA was administered over three courses.

At 61 months post-diagnosis, imaging studies showed multiple intra-abdominal recurrences. At 63 months, complete cytoreductive surgery involving peritoneal metastasectomy, port removal, appendectomy, and high anterior resection of the rectum was performed. Postoperative chemotherapy was administered with gemcitabine, but subsequent imaging studies indicated recurrence.

Subsequent lines of chemotherapy, including CPT-11, vincristine and prednisone (VP), NDP, paclitaxel and bevacizumab (PTX+Bev), and next-generation taxoids and bevacizumab (NGT+Bev), were continued but were unsuccessful in halting disease progression.

At 95 months post-diagnosis, in search of novel treatment options, a comprehensive cancer gene panel test (FoundationOne® CDx) was performed. Mutations in TP53 (TP53-G187fs*17) and amplification of MDM2 were observed, while microsatellite instability was negative, and BRCA was identified as wild-type. The patient succumbed to the disease 115 months post-initial diagnosis.

**Supplementary Materials and Methods**

**Cell Culture**

All cells were cultured at 37 °C in an incubator supplied with 5% CO2. All cell lines were routinely screened for mycoplasma contamination, with the last test conducted on January 22, 2024, using a Mycoplasma PCR Detection Kit. All cell line-based experiments were performed prior to the 10th passage.

**Reagents**

For in vitro experiments, CAY10566 was suspended in dimethyl sulfoxide (DMSO) to prepare a 1-mM stock solution. For in vivo application, CAY10566 was formulated in methylcellulose at 0.5 mg/mL and administered via oral gavage at a dose of 2.5 mg/kg every 12 h. Methylcellulose was used as the vehicle.

**Fatty Acid Preparation**

A 50 mM free fatty acid (FFA) sodium solution was prepared by dissolving the fatty acids in 50 mM sodium hydroxide (NaOH) and heating the mixture between 70 and 80 °C in a shaking water bath. This solution was then combined with FFA-free bovine serum albumin (FFA-free BSA) preheated to 55 °C. The mixture was agitated vigorously for 10 s and subsequently incubated at 55 °C for an additional 15 min in a shaking water bath to facilitate conjugation. The conjugated FFA-BSA solution was cooled to 25 °C, passed through a 0.45 µm-pore-size membrane filter, and stored at −20 °C until subsequent experimental use.

**Cell Viability Assay**

Cells were seeded (7.5 × 103 cells/well) in 96-well plates and treated with either 50 µM of palmitate, stearate, palmitoleate, or oleate for 72 h. To assess cell viability, 100 µL of a 500 µg/mL 3-[4,5-dimethylthiazol-2-yl]-2,5 diphenyl tetrazolium bromide solution (MTT) prepared in RPMI-1640 medium was added to each well. The plates were incubated for 2 h in an incubator, after which the MTT solution was aspirated, and the formed formazan crystals were solubilized in 100 µL methanol. Cell viability was quantified by measuring the absorbance at 570 nm using an iMark Microplate Reader. Cell viability under each experimental condition was analyzed using four to eight replicates.

**Proliferation Assay**

Cells were seeded (7.5 × 103 cells/well) in 96-well plates and treated with either FFAs or CAY10566 at the indicated concentrations. At 24, 48, and 72 h post-incubation, the culture medium was removed, the cells were washed once with phosphate-buffered saline (PBS), and cell viability was assessed using the MTT assay.

**Stable Knockdown using shRNAs**

Stable OVCAR5 and OVCAR8 knockdown cell lines were generated via lentiviral transfection using two distinct lentiviral shRNAs targeting SCD and CHOP and a non-silencing control. For SCD, sh1 (Catalog# TRCN0000327814) and sh2 (Catalog# TRC0000327815) were purchased from Sigma-Aldrich; for CHOP, sh1 (Catalog# pDNA (VB900039-3848rmh)), sh2 (Catalog# pDNA (VB900039-3854gdh)), and short (Catalog# VB010000-0009mxc) were obtained from Vector Builder. After transfection, the cells were selected using puromycin, and the efficacy of knockdown was verified using RT-qPCR and western blot analyses.

**IC50 Determination**

Cells were seeded (7.5 × 103 cells/well) into 96-well plates, and their viability in response to FFAs or CAY10566 was assessed after 72 h treatment. For the combination treatments, stearate, CAY10566, and oleate were added simultaneously at the specified concentrations, and cell viability was evaluated using the MTT assay.

**Flow Cytometry**

Apoptosis was quantified using the Annexin V APC Apoptosis Assay Kit and flow cytometry. For in vitro experiments, cells cultured in 60 mm dishes were harvested after 24 h treatment with FFAs at the designated concentrations. For in vivo experiments, tumors from mice fed either an NFD or S-HFD were dissociated into single-cell suspensions using a gentleMACS Octo Dissociator with Heater and a Tumor Dissociation Kit for humans, according to the manufacturer’s protocol.

**Enzyme-linked Immunosorbent Assay (ELISA)**

Blood samples were collected from mice via cardiac puncture during euthanasia. Serum insulin levels were quantified using a Mouse Insulin ELISA Kit. All standards and samples were analyzed in sextuplicate.

**Western Blot Analysis**

The cells were lysed in a buffer containing triethanolamine-HCl supplemented with 0.2% sodium dodecyl sulfate, 1% Triton X-100, and a complete-mini protease inhibitor cocktail. Cell lysates were sonicated for 15 min, and protein concentrations were determined using the Pierce-BCA protein assay kit with BSA as the standard. Equal amounts of protein were subjected to electrophoresis on a bis-tris gradient polyacrylamide gel and subsequently transferred onto polyvinylidene fluoride membranes. The membranes were blocked for 1 h at room temperature using Blocking One. They were then incubated overnight at 4 °C with primary antibodies under gentle shaking. Following washing with Tris-Buffered Saline with 0.1% Tween 20, the membranes were incubated with horseradish peroxidase (HRP)-conjugated secondary antibodies for 1 h at room temperature.

All experiments were performed in triplicate.

Immunoreactive signals were detected using the WesternBright ECL kit and the ChemiDoc™ XRS+ system and quantified using Image Lab 2.0 software.

**IHC and Immunofluorescence**

IHC was performed using the streptavidin-biotin peroxidase complex method as previously reported1. Epitope retrieval was performed at 90 °C for 20 min in 0.01 M of citrate buffer (pH 6.0), mixing 0.01 M of citric acid monohydrate and 0.01 M of trisodium citrate dihydrate. Tumor samples were incubated with specific primary antibodies overnight at 4 °C, followed by a 1-h incubation with biotinylated goat anti-rabbit secondary antibodies at room temperature. IHC images were captured using a BZ-9000 microscope and processed for H and DAB channels using the Color Deconvolution2 plugin in ImageJ software. The threshold was adjusted for each experiment, and H scores were calculated by multiplying the intensity score by the area percentage for each population present in a given tumor sample: H Score = 1 × (% of 1+areas) + 2 × (% of 2+areas) + 3 × (% of 3+areas).

**Reverse transcription PCR and real-time quantitative PCR**

Total RNA was isolated using an RNeasy Mini Kit and reverse-transcribed using the ReverTra Ace qPCR RT Kit according to the manufacturer's guidelines. Gene amplification was conducted using the PowerUp SYBR Green Master Mix on a StepOnePlus Real-Time PCR System. Relative mRNA expression levels were ascertained using the ΔΔCt method, with SCD expression normalized to β-actin expression and CHOP expression normalized to GAPDH expression.

**Liquid Chromatography with Tandem Mass Spectrometry (LC-MS/MS)**

For in vitro experiments, 2×106 OVCAR5 cells were seeded onto six 10-cm dishes and cultured for 24 h. Next, the plates were individually cultured for an additional 24 h in the following media:

(1) medium containing 5% FFA-free BSA with DMSO as the control vehicle

(2) medium containing 5% FFA-free BSA with 1 µM CAY10566

(3) medium containing 5% FFA-free BSA with 50 µM stearate and DMSO

(4) medium containing 5% FFA-free BSA with 50 µM stearate and 1 µM CAY10566

(5) medium containing 5% FFA-free BSA with 50 µM oleate and DMSO

(6) medium containing 5% FFA-free BSA with 50 µM oleate and 1 µM CAY10566.

The cells were then washed twice with ice-cold PBS, harvested using a disposable scraper in 700 μL ice-cold saline, transferred to 1.5-mL collection tubes, and centrifuged at 100 ×g at 4 °C for 15 min. After aspirating the supernatants, the cell pellets were weighed, snap-frozen in liquid nitrogen, and stored at −80 °C.

For in vivo experiments, tumors harvested from mice harboring OVCAR5 xenografts subjected to CAY10566 treatment were used. The tumors were sliced into approximately 2–3 mm3 cubes, transferred to 1.5-mL collection tubes, weighed, snap-frozen in liquid nitrogen, and stored at −80 °C.

For in vitro and in vivo experiments, pre-weighed, dimple-processed polypropylene tubes supplied as part of a Biomasher II were used. Ethanol containing oleate-d9 at 0.5 pmol/μL as an internal standard (IS) was added to the collection tubes containing cells or tumors at 0.1 mg/μL. The samples were homogenized using dimple-processed polyoxymethylene stir bars, which were also part of the Biomasher II. The homogenates were vortexed for 30 min at 4 °C, centrifuged at 16000 ×g for 10 min at 4 °C, and the supernatants were transferred to new 1.5-mL polypropylene tubes, and stored at −80 °C until further analysis.

For analysis, the stored samples were diluted 1:4 with ethanol and transferred to polymethylpentene vials, and 3 μL sample was injected into the LC-MS/MS system. An isocratic gradient of A99%/B1% at 0.4 mL/min for 9.01 min was used for separation; ethanol and 90% 2-propanol/10% acetonitrile/10 mM ammonium formate/0.1% formic acid were used as solvents A and B, respectively. ACQUITY UPLC BEH C18 1.7 μm, 2.1 × 100 mm set to 40 °C was used as the separation column. Simultaneous analyte detection and analyses were performed using pseudo-multiple reaction monitoring (pMRM) combined with negative-polarity electrospray ionization. The following pMRM transitions were used: oleate (281.05 > 281.25 m/z, CE 12 V), palmitate (255.05 > 255.25 m/z, CE 12 V), stearate (283.15 > 283.25 m/z, CE 14 V), and oleate-d9 (290.20 > 290.30 m/z, CE 13 V). Peaks were analyzed using LabSolutions software (version 5.99, Shimadzu). The abundance of each analyte was calculated by normalizing the peak areas of the analytes to those of the IS, followed by application to the corresponding calibration curves for each analyte. Calibration curves were generated by processing samples prepared from untreated OVCAR5 cell homogenates spiked with varying amounts of analytes. All plastic tubes, stir bars, and vials were washed with ethanol and dried prior to use.

**RNA Sequencing**

OVCAR5 cells (3×105) were seeded into six-well plates and cultured for 24 h under standard conditions. Following the initial 24 h culture period, the cells were subjected to different treatment conditions for an additional 24 h in the following media:

(1) medium containing 5% FFA-free BSA with DMSO as the control vehicle

(2) medium containing 5% FFA-free BSA with 1 µM CAY10566

(3) medium containing 5% FFA-free BSA with 50 µM stearate and DMSO

(4) medium containing 5% FFA-free BSA with 50 µM stearate and 1 µM CAY10566

(5) medium containing 5% FFA-free BSA with 50 µM oleate and DMSO

(6) medium containing 5% FFA-free BSA with 50 µM oleate and 1 µM CAY10566.

Each treatment was conducted in triplicate to ensure the reproducibility and reliability of the data. Following the 24 h treatment period, the cells were harvested for RNA sequencing analysis. Total RNA from cells was extracted using an RNeasy Micro kit according to the supplier’s instructions.

RNA sequencing was conducted on the Illumina NovaSeq 6000 platform to generate 100 bp paired-end reads. Raw reads were processed using Trim Galore software. The cleaned reads were aligned to the human genome GRCh38 (ENSEMBL release 99) using the STAR aligner (v2.7.1a). Transcript quantification was performed using RSEM (v1.3.1). R packages were used for hierarchical clustering (heatmap.2 in version 3.1.1 of the plots package), PCA (prcomp in the Stats R package version 4.1.1), differential expression analysis (Linear Models for Microarray Data, limma version 3.28.14), and construction of volcano plots. Gene ontology biological process (GO) and KEGG pathway enrichment analyses were performed using iDEP.96 2(version 96) installed in RStudio (version 1.2.5). DEGs were identified using a FDR cutoff of 0.05 and a minimum fold change of 1.25. Pathway analysis was conducted using GAGE, with gene sets from the GO Biological Process database. The gene set size was set at a minimum of 5 and a maximum of 2000, and the pathway significance cutoff (FDR) was set at 0.2.

Sequence data have been deposited at Gene Expression Omnibus with accession number GSE248408.

**Preparation of Mouse Xenograft Models Utilizing Human Ovarian Cancer Cell Lines**

The cancer cell lines used for xenografts included OVCAR5, OVCAR8, SKOV3, along with OVCAR5 and OVCAR8 cells modified for shRNA-mediated SCD knockdown (OVCAR5-shSCD-1, OVCAR5-shCtr, OVCAR8-shSCD-1, and OVCAR8-shCtr). Control and knockdown cells were injected into opposite flanks of the same mouse in shRNA experiments.

Treatment with CAY10566 was administered at a dosage of 2.5 mg/kg every 12 h via oral gavage, prepared in 0.5 mg/mL methylcellulose, after tumors became palpable.

Tumor volume calculation was performed using the formula (length × width²)/2. Animals were euthanized by CO2 inhalation before tumors exceeded 2 cm in any dimension or before the onset of ulcerations, in line with ethical considerations for animal welfare.

**Mouse Xenograft Models Harboring PDXs**

After collecting surgical specimens from patients at Kyoto University Hospital, primary xenograft tumors were generated by subcutaneously transplanting tumor sections into NOD SCID mice, followed by resection and cryopreservation at −80 °C using Cell Banker1.

PDX72 and PDX82 models were further developed in nude and NOG mice, respectively, with tumors being dissected and subdivided for implantation into mice along with Matrigel.

Following a 3-5 week establishment period, mice were allocated to treatment groups, with specific dietary regimens (NFD, S-HFD, O-HFD) initiated alongside administration of vehicle or CAY10566 via oral gavage every 12 hours.

Exclusion criteria at randomization included mice with tumors exceeding 5 mm or under 2 mm in diameter. The study included six mice in the PDX72 group and four in the PDX82 group.

CAY10566's administration protocol involved 2.5 mg/kg dosage every 12 hours, using methylcellulose as the vehicle.

**References:**

1. Yamanoi K, et al. Suppression of ABHD2, identified through a functional genomics screen, causes anoikis resistance, chemoresistance and poor prognosis in ovarian cancer. Oncotarget **7**, 47620-47636 (2016).

2. Ge X. iDEP Web Application for RNA-Seq Data Analysis. Methods Mol Biol **2284**, 417-443 (2021).
